# Supplementary material for: Comprehensive Evaluation of the Oral Health Status, Salivary Gland Function, and Oxidative Stress in the Saliva of Patients with Subacute Phase of Stroke: A Case-Control Study
Source: PubMed Central journal article supplement (PMC7408698; doi:10.3390/jcm9072252), 2020-07-15
Supplement: jcm-09-02252-s001.pdf [file jcm-09-02252-s001.pdf]

**Table 1.** Salivary redox biomarkers in patients with ischemic and hemorrhagic stroke and control.

| Parametr |           | Group                   |                                 |                                   | <i>p</i>                  |
|----------|-----------|-------------------------|---------------------------------|-----------------------------------|---------------------------|
|          |           | Control – A<br>(N = 30) | Ischemic stroke - B<br>(N = 24) | Hemorrhagic stroke - C<br>(N = 6) |                           |
| AGE NWS  | Mean ± SD | 422.33 ± 113.46         | 331.38 ± 72.66                  | 295.55 ± 32.85                    | <i>p</i> = 0.001 *, A>B,C |
| AGE SWS  | Mean ± SD | 361.63 ± 104.85         | 243.02 ± 112.12                 | 306.54 ± 95.29                    | <i>p</i> = 0.001 *, A>B   |
| AOPP NWS | Mean ± SD | 68.95 ± 31.15           | 26.03 ± 7.36                    | 30.39 ± 11.39                     | <i>p</i> < 0.001 *, A>C,B |
| AOPP SWS | Mean ± SD | 83.26 ± 20.99           | 39.33 ± 9.25                    | 40.1 ± 12.67                      | <i>p</i> < 0.001 *, A>C,B |
| CAT NWS  | Mean ± SD | 0.7 ± 0.6               | 0.27 ± 0.1                      | 0.33 ± 0.11                       | <i>p</i> = 0.002 *, A>B   |
| CAT SWS  | Mean ± SD | 0.92 ± 0.59             | 0.47 ± 0.15                     | 0.41 ± 0.11                       | <i>p</i> = 0.001 *, A>B,C |
| GSH NWS  | Mean ± SD | 13.28 ± 3.18            | 12.7 ± 3.29                     | 13.27 ± 2.12                      | <i>p</i> = 0.782,         |
| GSH SWS  | Mean ± SD | 29.9 ± 7.72             | 56.88 ± 6.93                    | 53.1 ± 5.37                       | <i>p</i> < 0.001 *, B,C>A |
| LOOH NWS | Mean ± SD | 490.6 ± 133.83          | 320.4 ± 122.25                  | 221.63 ± 66.96                    | <i>p</i> < 0.001 *, A>B,C |
| LOOH SWS | Mean ± SD | 820.67 ± 182.33         | 405.85 ± 91.68                  | 439.95 ± 124.31                   | <i>p</i> < 0.001 *, A>C,B |
| NWS flow | Mean ± SD | 0.42 ± 0.25             | 0.34 ± 0.09                     | 0.29 ± 0.08                       | <i>p</i> = 0.166,         |
| OSI NWS  | Mean ± SD | 73.34 ± 41.19           | 60.68 ± 21.83                   | 64.32 ± 20.45                     | <i>p</i> = 0.371,         |
| OSI SWS  | Mean ± SD | 104.19 ± 50.78          | 51.77 ± 31.62                   | 49.22 ± 14.78                     | <i>p</i> < 0.001 *, A>B,C |
| Px NWS   | Mean ± SD | 0.06 ± 0.03             | 0.03 ± 0.01                     | 0.03 ± 0.01                       | <i>p</i> < 0.001 *, A>C,B |
| Px SWS   | Mean ± SD | 0.08 ± 0.04             | 0.03 ± 0.01                     | 0.03 ± 0.01                       | <i>p</i> < 0.001 *, A>C,B |
| SOD NWS  | Mean ± SD | 14.67 ± 3.67            | 11.78 ± 4.61                    | 15.52 ± 2.36                      | <i>p</i> = 0.019 *, C,A>B |
| SOD SWS  | Mean ± SD | 26.97 ± 7.87            | 30.2 ± 5.57                     | 30.93 ± 6.78                      | <i>p</i> = 0.174,         |
| SWS flow | Mean ± SD | 0.68 ± 0.32             | 0.88 ± 0.26                     | 1.02 ± 0.29                       | <i>p</i> = 0.008 *, C,B>A |
| TAC NWS  | Mean ± SD | 3.5 ± 1.36              | 2.94 ± 0.62                     | 3.08 ± 0.25                       | <i>p</i> = 0.15,          |
| TAC SWS  | Mean ± SD | 4.41 ± 1.85             | 3.82 ± 0.54                     | 3.7 ± 0.46                        | <i>p</i> = 0.225,         |
| TOS NWS  | Mean ± SD | 215.33 ± 51.16          | 170.31 ± 42.44                  | 195 ± 47.2                        | <i>p</i> = 0.004 *, A>B   |
| TOS SWS  | Mean ± SD | 400.43 ± 139.39         | 192.46 ± 106.86                 | 180.43 ± 56.05                    | <i>p</i> < 0.001 *, A>B,C |
| UA NWS   | Mean ± SD | 65.7 ± 14.73            | 51.14 ± 9.95                    | 59.37 ± 8.66                      | <i>p</i> < 0.001 *, A>B   |
| UA SWS   | Mean ± SD | 67.79 ± 28.73           | 53.07 ± 12.45                   | 44.44 ± 16.09                     | <i>p</i> = 0.017 *, A>B,C |

*p* - ANOVA + post-hoc analysis (Fishers's LSD test). \* statistically significant (*p* < 0.05)

**Table 2.** Multifactorial regression of salivary redox biomarkers in patients with ischemic and hemorrhagic stroke and control.

| Parameter | Hemorrhagic stroke                   | Ischemic stroke                     | Gender: Male                      | Age [yrs]                        | ACE III                         | ADL                             | FIM                            | Berg                           | NWS flow                            | SWS flow                                |
|-----------|--------------------------------------|-------------------------------------|-----------------------------------|----------------------------------|---------------------------------|---------------------------------|--------------------------------|--------------------------------|-------------------------------------|-----------------------------------------|
| AGE NWS   | -14.968 (-149.991-120.055), p=0.829  | 19.598 (-115.741-154.938), p=0.778  | -15.31 (-67.559-36.939), p=0.568  | -0.173 (-2.307-1.96), p=0.874    | -1.557 (-3.458-0.343), p=0.115  | -5.332 (-20.8-10.137), p=0.502  | 0.915 (-1.982-3.811), p=0.539  | -1.048 (-5.312-3.215), p=0.632 | 130.891 (-17.048-278.83), p=0.089   | 33.776 (-58.491-126.042), p=0.476       |
| AGE SWS   | 170.765 (30.711-310.818), p=0.021 *  | 128.323 (-12.059-268.705), p=0.079  | 5.801 (-48.395-59.997), p=0.835   | 0.485 (-1.727-2.698), p=0.669    | 0.079 (-1.892-2.05), p=0.938    | 13.2 (-2.845-29.245), p=0.113   | -2.36 (-5.364-0.645), p=0.13   | 0.677 (-3.746-5.1), p=0.765    | -135.414 (-288.865-18.037), p=0.09  | -117.073 (-212.777--21.369), p=0.02 *   |
| AOPP NWS  | 49.203 (16.909-81.498), p=0.004 *    | 44.218 (11.848-76.588), p=0.01 *    | 2.318 (-10.179-14.815), p=0.718   | 0.035 (-0.475-0.545), p=0.894    | 0.136 (-0.319-0.59), p=0.561    | 2.88 (-0.819-6.58), p=0.133     | -0.571 (-1.264-0.122), p=0.112 | -0.134 (-1.153-0.886), p=0.799 | -17.875 (-53.259-17.508), p=0.327   | -10.718 (-32.786-11.35), p=0.346        |
| AOPP SWS  | 56.203 (38.161-74.245), p<0.001 *    | 38.359 (20.275-56.443), p<0.001 *   | 1.492 (-5.489-8.474), p=0.677     | 0.007 (-0.279-0.292), p=0.964    | 0.042 (-0.212-0.296), p=0.748   | 1.377 (-0.689-3.444), p=0.198   | -0.032 (-0.419-0.355), p=0.872 | -0.516 (-1.085-0.054), p=0.082 | -36.86 (-56.627--17.092), p=0.001 * | -21.05 (-33.378--8.721), p=0.002 *      |
| CAT NWS   | 0.018 (-0.537-0.573), p=0.95         | 0.221 (-0.335-0.778), p=0.44        | -0.066 (-0.281-0.149), p=0.548    | -0.006 (-0.015-0.003), p=0.18    | 0.003 (-0.005-0.011), p=0.454   | -0.057 (-0.121-0.006), p=0.083  | -0.011 (-0.023-0.001), p=0.071 | 0.026 (0.008-0.043), p=0.006 * | -0.09 (-0.699-0.518), p=0.772       | 0.012 (-0.367-0.392), p=0.95            |
| CAT SWS   | -0.424 (-0.961-0.112), p=0.127       | -0.044 (-0.582-0.493), p=0.872      | 0 (-0.208-0.207), p=0.997         | -0.01 (-0.018--0.001), p=0.031 * | -0.006 (-0.014-0.001), p=0.118  | -0.02 (-0.081-0.042), p=0.528   | 0.003 (-0.008-0.015), p=0.596  | -0.013 (-0.03-0.004), p=0.152  | 0.363 (-0.225-0.951), p=0.232       | -0.053 (-0.42-0.313), p=0.776           |
| GSH NWS   | -0.11 (-4.584-4.363), p=0.962        | -0.445 (-4.929-4.039), p=0.846      | -0.081 (-1.813-1.65), p=0.927     | -0.026 (-0.097-0.045), p=0.472   | -0.064 (-0.127--0.001), p=0.052 | 0.181 (-0.331-0.694), p=0.492   | 0.04 (-0.056-0.136), p=0.413   | -0.08 (-0.222-0.061), p=0.27   | 3.208 (-1.693-8.11), p=0.206        | -0.341 (-3.398-2.716), p=0.828          |
| GSH SWS   | -18.162 (-26.758--9.567), p<0.001 *  | -15.081 (-23.697--6.466), p=0.001 * | -0.732 (-4.058-2.594), p=0.668    | 0.056 (-0.08-0.192), p=0.422     | 0.303 (0.182-0.424), p<0.001 *  | 0.354 (-0.631-1.338), p=0.485   | -0.006 (-0.19-0.179), p=0.952  | -0.031 (-0.303-0.24), p=0.822  | -1.468 (-10.886-7.949), p=0.761     | -1.138 (-7.012-4.735), p=0.706          |
| LOOH NWS  | 187.958 (-5.959-381.876), p=0.063    | 138.619 (-55.754-332.991), p=0.168  | -15.688 (-90.727-59.352), p=0.684 | 0.572 (-2.492-3.635), p=0.716    | -0.961 (-3.691-1.768), p=0.493  | 0.788 (-21.427-23.004), p=0.945 | 1.815 (-2.345-5.975), p=0.397  | -3.723 (-9.847-2.401), p=0.239 | 22.84 (-189.628-235.307), p=0.834   | -1.281 (-133.792-131.231), p=0.985      |
| LOOH SWS  | 339.484 (157.436-521.532), p=0.001 * | 261.363 (78.887-443.838), p=0.007 * | 25.196 (-45.25-95.643), p=0.487   | 1.634 (-1.242-4.51), p=0.271     | -1.375 (-3.938-1.187), p=0.298  | -13.175 (-34.03-7.681), p=0.222 | 1.112 (-2.793-5.017), p=0.579  | 1.048 (-4.701-6.796), p=0.723  | -118.53 (-317.993-80.933), p=0.25   | -228.597 (-352.998--104.196), p=0.001 * |
| OSI NWS   | -0.483 (-50.243-49.278), p=0.985     | -13.266 (-63.143-36.612), p=0.605   | -0.429 (-19.685-18.827), p=0.965  | -0.198 (-0.984-0.588), p=0.624   | -0.171 (-0.872-0.529), p=0.634  | -0.242 (-5.942-5.459), p=0.934  | 0.099 (-0.968-1.167), p=0.856  | -0.609 (-2.18-0.962), p=0.451  | 18.549 (-35.972-73.07), p=0.508     | -12.536 (-46.539-21.468), p=0.473       |

| Parameter | Hemorrhagic stroke                | Ischemic stroke                    | Gender: Male                      | Age [yrs]                      | ACE III                        | ADL                              | FIM                            | Berg                              | NWS flow                           | SWS flow                            |
|-----------|-----------------------------------|------------------------------------|-----------------------------------|--------------------------------|--------------------------------|----------------------------------|--------------------------------|-----------------------------------|------------------------------------|-------------------------------------|
| OSI SWS   | 26.739 (-29.313-82.792), p=0.354  | 37.632 (-18.553-93.816), p=0.195   | 27.649 (5.958-49.339), p=0.016 *  | 0.275 (-0.61-1.161), p=0.545   | 0.061 (-0.728-0.85), p=0.879   | -1.294 (-7.715-5.128), p=0.695   | -0.939 (-2.141-0.264), p=0.132 | 1.814 (0.044-3.584), p=0.05       | 47.964 (-13.45-109.379), p=0.132   | -45.342 (-83.645--7.039), p=0.025 * |
| Px NWS    | 0.014 (-0.018-0.046), p=0.395     | 0.024 (-0.008-0.056), p=0.143      | 0.004 (-0.009-0.016), p=0.573     | 0 (0-0.001), p=0.217           | 0 (-0.001-0), p=0.155          | -0.002 (-0.006-0.002), p=0.291   | 0 (-0.001-0), p=0.29           | 0.001 (0-0.002), p=0.022 *        | -0.003 (-0.037-0.032), p=0.877     | 0.019 (-0.003-0.041), p=0.093       |
| Px SWS    | 0.043 (0.006-0.08), p=0.027 *     | 0.041 (0.004-0.078), p=0.036 *     | -0.002 (-0.016-0.012), p=0.781    | 0 (-0.001-0.001), p=0.815      | 0 (-0.001-0), p=0.151          | 0 (-0.004-0.005), p=0.85         | -0.001 (-0.002-0), p=0.081     | 0.001 (0-0.002), p=0.116          | 0.032 (-0.008-0.073), p=0.125      | 0.013 (-0.012-0.038), p=0.32        |
| SOD NWS   | 5.102 (-0.937-11.142), p=0.104    | 3.262 (-2.791-9.316), p=0.296      | -1.435 (-3.772-0.903), p=0.235    | 0.045 (-0.05-0.141), p=0.359   | 0.018 (-0.067-0.103), p=0.677  | 0.217 (-0.475-0.909), p=0.542    | -0.083 (-0.212-0.047), p=0.216 | 0.099 (-0.091-0.29), p=0.312      | -1.167 (-7.785-5.45), p=0.731      | -1.165 (-5.292-2.962), p=0.583      |
| SOD SWS   | -5.335 (-15.317-4.646), p=0.3     | -3.996 (-14.001-6.009), p=0.437    | 3.372 (-0.491-7.234), p=0.093     | 0.112 (-0.046-0.27), p=0.17    | 0.022 (-0.119-0.162), p=0.765  | -0.504 (-1.648-0.639), p=0.392   | 0.088 (-0.126-0.302), p=0.423  | -0.036 (-0.351-0.279), p=0.824    | -5.642 (-16.578-5.294), p=0.317    | 0.057 (-6.763-6.878), p=0.987       |
| TAC NWS   | 0.415 (-1.055-1.884), p=0.583     | 0.691 (-0.783-2.164), p=0.363      | 0.087 (-0.482-0.655), p=0.766     | 0.011 (-0.012-0.034), p=0.359  | -0.004 (-0.025-0.017), p=0.704 | -0.076 (-0.245-0.092), p=0.38    | -0.014 (-0.045-0.018), p=0.404 | 0.046 (0-0.092), p=0.058          | -0.8 (-2.411-0.81), p=0.335        | 1.064 (0.059-2.068), p=0.043 *      |
| TAC SWS   | -1.034 (-2.766-0.698), p=0.248    | -0.577 (-2.313-1.159), p=0.518     | -0.761 (-1.431--0.091), p=0.031 * | -0.002 (-0.03-0.025), p=0.86   | 0.005 (-0.019-0.03), p=0.672   | -0.162 (-0.36-0.037), p=0.116    | 0.043 (0.005-0.08), p=0.029 *  | -0.074 (-0.129--0.019), p=0.011 * | 0.282 (-1.615-2.18), p=0.772       | 0.917 (-0.266-2.101), p=0.135       |
| TOS NWS   | 28.955 (-41.757-99.667), p=0.426  | 14.677 (-56.201-85.555), p=0.687   | -3.202 (-30.565-24.161), p=0.82   | 0.168 (-0.949-1.285), p=0.769  | -0.203 (-1.198-0.793), p=0.691 | -2.668 (-10.769-5.433), p=0.522  | -0.818 (-2.335-0.699), p=0.296 | 1.275 (-0.958-3.508), p=0.268     | -25.843 (-103.319-51.633), p=0.516 | 27.813 (-20.508-76.133), p=0.265    |
| TOS SWS   | 5.794 (-162.608-174.197), p=0.947 | 56.645 (-112.153-225.443), p=0.514 | 35.569 (-29.598-100.735), p=0.29  | 1.312 (-1.348-3.973), p=0.338  | 0.497 (-1.874-2.867), p=0.683  | -15.285 (-34.578-4.008), p=0.127 | -0.286 (-3.899-3.326), p=0.877 | 0.46 (-4.858-5.777), p=0.866      | 122.354 (-62.158-306.866), p=0.2   | -113.307 (-228.383-1.77), p=0.059   |
| UA NWS    | 6.179 (-12.896-25.253), p=0.528   | 4.604 (-14.515-23.724), p=0.639    | 1.565 (-5.817-8.946), p=0.68      | 0.114 (-0.187-0.416), p=0.46   | -0.125 (-0.394-0.143), p=0.364 | -0.189 (-2.374-1.996), p=0.866   | 0.163 (-0.246-0.572), p=0.439  | -0.294 (-0.897-0.308), p=0.343    | 2.571 (-18.329-23.47), p=0.811     | -7.658 (-20.692-5.377), p=0.255     |
| UA SWS    | -9.506 (-42.088-23.076), p=0.57   | -0.796 (-33.455-31.862), p=0.962   | 8.128 (-4.48-20.736), p=0.212     | -0.132 (-0.647-0.383), p=0.618 | -0.054 (-0.512-0.405), p=0.819 | -3.013 (-6.745-0.72), p=0.12     | 0.064 (-0.635-0.763), p=0.858  | 0.299 (-0.73-1.328), p=0.572      | 10.685 (-25.014-46.384), p=0.56    | 5.158 (-17.107-27.423), p=0.652     |

\* statistically significant (p<0,05).
